# Supplementary material for: The NExus Solutions Tool (NEST) v1.0: an open platform for optimizing multi-scale energy–water–land system transformations
Source: Copernicus journal article supplement (doi:10.5194/gmd-13-1095-2020), 2020-03-11
Supplement: Supplementary file 1 [file gmd-13-1095-2020-supplement.zip]

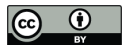

## *Supplement of*

# **The NExus Solutions Tool (NEST) v1.0: an open platform for optimizing multi-scale energy–water–land system transformations**

**Adriano Vinca et al.**

*Correspondence to:* Adriano Vinca ([vinca@iiasa.ac.at](mailto:vinca@iiasa.ac.at))

- [gmd-13-1095-2020-supplement-title-page.pdf](#)
- [NEST\\_GMD\\_SI.pdf](#)
- [Variable\\_capacity\\_factor.xlsx](#)

The copyright of individual parts of the supplement might differ from the CC BY 4.0 License.
