# Supplementary material for: The NExus Solutions Tool (NEST) v1.0: an open platform for optimizing multi-scale energy–water–land system transformations
Source: Copernicus journal article supplement (doi:10.5194/gmd-13-1095-2020), 2020-03-11
Supplement: Supplementary file 2 [file gmd-13-1095-2020-supplement.zip]

# Supplement

Adriano Vinca et al.<sup>1,2</sup>

<sup>1</sup>International Institute for Applied Systems Analysis, Austria

<sup>2</sup>Institute for Integrated Energy Systems, University of Victoria, Canada

**Correspondence:** Adriano Vinca (vinca@iiasa.ac.at)

*Copyright statement.* Author(s) 2019. This work is distributed under the Creative Commons Attribution 4.0 License.

## **S1 Exogenous demands**

(a) Agriculture demands

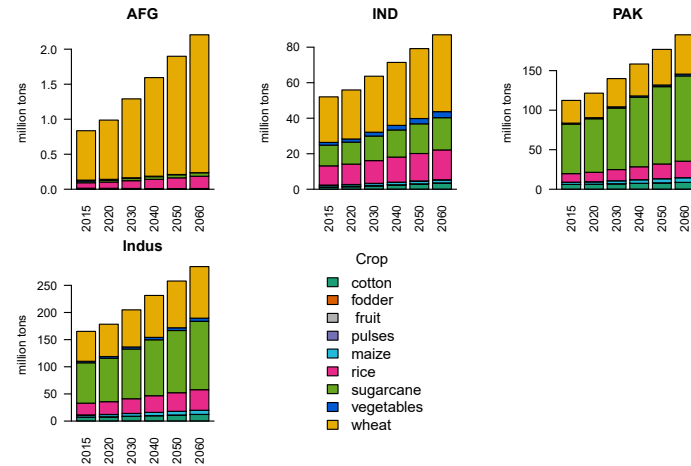

(b) Agriculture demands

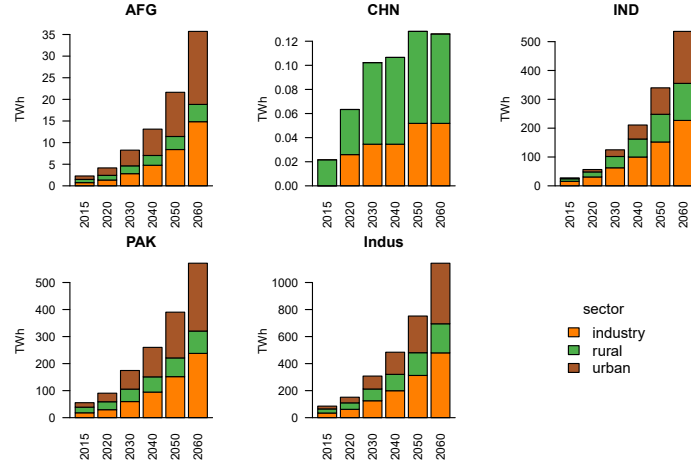

(c) Water sectoral demands

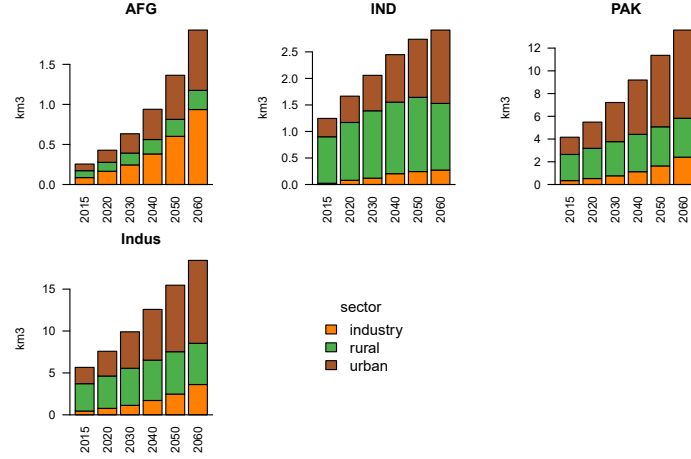

22

**Figure S1.** Exogenous agriculture products (a), electricity (b) and water (c) demands. For each country and the whole Indus basin, from 2010 to 2060.

## S2 Canals, hydroelectric projects and power plants data

| Project           | Capacity [ m <sup>3</sup> / sec ] | Length [ km ] | Long. In [ °E ] | Lat. In [ °N ] | Long. Out [ °E ] | Lat. Out [ °N ] |
|-------------------|-----------------------------------|---------------|-----------------|----------------|------------------|-----------------|
| Rasul-Qadirabad   | 538                               | 44            | 73.5187         | 32.6830        | 73.7135          | 32.3370         |
| Qadirabad-Bulloki | 527                               | 129           | 73.6858         | 32.3228        | 73.9138          | 31.2982         |
| Balloki-Sulemanki | 524                               | 87            | 73.8590         | 31.2226        | 73.9241          | 30.4953         |
| Trimmu-Sidhnai    | 312                               | 64            | 72.1462         | 31.1450        | 72.1933          | 30.5690         |
| Sidhnai-Mailsi    | 283                               | 94            | 72.1582         | 30.5713        | 72.2459          | 29.7278         |
| Chashma-Jhelum    | 615                               | 135           | 71.3837         | 32.4358        | 72.2214          | 31.9680         |
| Taunsa-Panjnad    | 340                               | 72            | 70.8505         | 30.5137        | 71.3677          | 30.2735         |
| Marala-Ravi       | 622                               | 97            | 74.4698         | 32.6699        | 74.6239          | 31.8966         |
| Ravi-Bedian       | 142                               | 82            | 74.4701         | 31.7212        | 74.1755          | 30.7265         |
| Bambanwala-Ravi   | 142                               | 82            | 74.2941         | 32.3609        | 74.4701          | 31.7212         |
| Chenab-Bambanwala | 453                               | 28            | 74.4698         | 32.6699        | 74.2941          | 32.3609         |
| Chenab-Ravi       | 311                               | 44            | 74.2941         | 32.3609        | 74.0820          | 31.4142         |
| Keenjhar-Karachi  | 31                                | 44            | 68.0500         | 24.9500        | -                | -               |
| Indira Gandhi     | 138                               | 602           | 75.0111         | 31.1628        | -                | -               |

**Table S1.** Major conveyance canals in the NEST implementation of the IRB that are linking river systems or for interbasin transfers. Locations, capacities and lengths are approximate and estimated by the authors based on reported technical data. Interbasin transfers are occurring where no outlet location is defined.

| Project           | Country  | Longitude [ °E ] | Latitude [ °N ] | Capacity [ MW ] | Storage [ km <sup>3</sup> ] | Opening  |
|-------------------|----------|------------------|-----------------|-----------------|-----------------------------|----------|
| Azad Pattan       | Pakistan | 73.5715          | 33.7678         | 700             | -                           | 2022     |
| Patrind           | Pakistan | 73.4288          | 34.3440         | 150             | -                           | 2017     |
| Gulpur            | Pakistan | 73.8625          | 33.4553         | 102             | -                           | 2019     |
| Suki Kinari       | Pakistan | 73.5427          | 34.7231         | 870             | -                           | 2022     |
| Kohala            | Pakistan | 73.6546          | 34.2023         | 1100            | -                           | 2025     |
| Athmuqam          | Pakistan | 73.9107          | 34.5891         | 350             | -                           | 2020     |
| Golen Gol         | Pakistan | 72.0143          | 35.9212         | 58              | -                           | 2018     |
| Mahl              | Pakistan | 73.5667          | 34.9167         | 590             | -                           | 2025     |
| Neelum-Jhelum     | Pakistan | 73.7189          | 34.3928         | 968             | -                           | 2018     |
| Diamer-Bhasha     | Pakistan | 73.7370          | 35.5207         | 4500            | 10.5                        | 2023     |
| Tarbela Extension | Pakistan | 72.6983          | 34.0897         | 1410            | -                           | 2018     |
| Karot             | Pakistan | 73.6012          | 33.5998         | 720             | -                           | 2021     |
| Kalabagh          | Pakistan | 71.6136          | 32.9564         | 3600            | 7.5                         | proposed |
| Munda             | Pakistan | 71.5330          | 34.3532         | 740             | 0.9                         | proposed |
| Bunji             | Pakistan | 74.6159          | 35.6358         | 7100            | 0.2                         | proposed |
| Dasu              | Pakistan | 73.1933          | 35.3173         | 4320            | 0.8                         | 2021     |
| Akhori            | Pakistan | 72.4528          | 33.6905         | 600             | 8.6                         | 2025     |
| Sharmai           | Pakistan | 72.0053          | 35.2766         | 150             | 0.3                         | 2023     |
| Kishanganga       | India    | 74.7647          | 34.6475         | 360             | -                           | 2018     |
| Sawalkote         | India    | 75.0759          | 33.1691         | 1856            | -                           | proposed |
| Kirthai I         | India    | 75.1994          | 33.3868         | 390             | -                           | proposed |
| Kirthai II        | India    | 75.1994          | 33.3868         | 930             | -                           | proposed |
| Pakal Dul         | India    | 75.8136          | 33.4572         | 1000            | 0.1                         | proposed |
| Kwar              | India    | 75.8280          | 33.3623         | 540             | -                           | proposed |
| Kiru              | India    | 75.8898          | 33.3518         | 624             | -                           | proposed |
| Bursar            | India    | 75.6956          | 33.3903         | 800             | 0.6                         | proposed |
| Ujh               | India    | 75.5156          | 32.5590         | 212             | -                           | proposed |

**Table S2.** Additional planned hydropower projects included in the NEST implementation of the IRB. Locations, capacities and dates are approximate and estimated by the authors based on reported technical data.

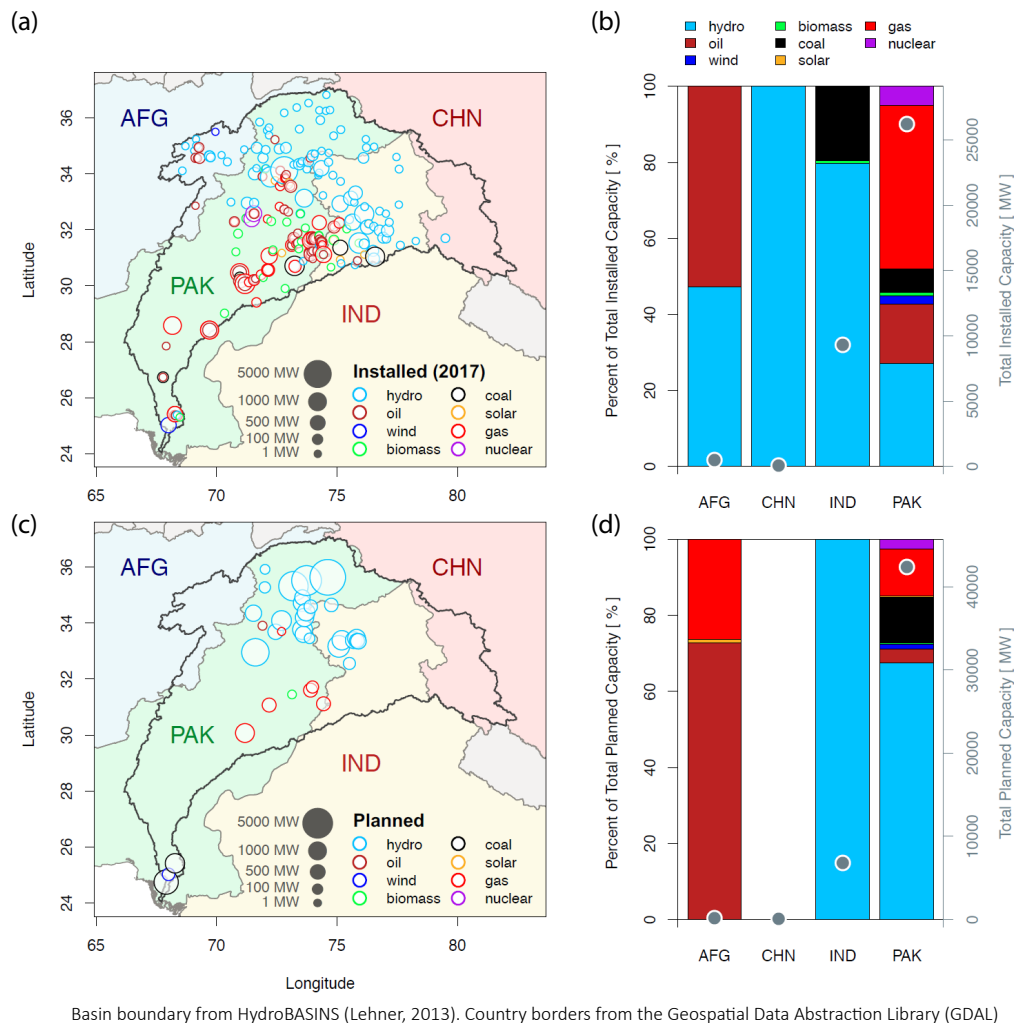

Basin boundary from HydroBASINS (Lehner, 2013). Country borders from the Geospatial Data Abstraction Library (GDAL)

**Figure S2.** Existing (a), (b) and planned (c), (d) power plant capacity in the NEST implementation of the IRB. Sources: World Electric Power Plant (WEPP) Database, Raptis et al. (2016); van Vliet et al. (2016)

### S3 Costs and Capacity Factor assumptions

Tables S3 and S4 show costs and capacity factor values for a number of technologies in the model. Technologies like transmission lines or water canals are not included, as costs are dependent on the length and the region. The tables only include a subset of energy technologies with different cooling systems. Costs for gas plant in combined cycle (*cc*), single turbine (*gt*) and steam turbine (*st*) configurations are reported for all cooling systems, air cooling (*ac*), closed loop (*cl*) and once through cooling (*oc*). Although we model these different cooling systems also for oil, coal, geothermal and nuclear power plants, we only show costs for closed loop in Tables S3 and S4.

Solar and wind power plants are divided in three groups having same cost assumptions but different levels of capacity factor, attached in the Supplementary Information *Variable\_capacity\_factor.xlsx*.

| Technology                          | $I_{cost}$ [unit] | $F_{cost}$ [unit] | $Var_{cost}$ [unit] | CF [-]   |
|-------------------------------------|-------------------|-------------------|---------------------|----------|
| Crops                               | [\$/ha]           | [\$/ha]           | [\$/(ha month)]     |          |
| wheat                               | 341               | 36                | 72                  | 1        |
| rice                                | 716               | 15                | 22                  | 1        |
| cotton                              | 416               | 9                 | 13                  | 1        |
| fodder                              | 130               | 3                 | 4                   | 1        |
| sugarcane                           | 849.6             | 17                | 25.5                | 1        |
| pulses                              | 1320              | 26.4              | 39.6                | 1        |
| maize                               | 1000              | 20                | 30                  | 1        |
| fruit                               | 545.5             | 11.5              | 16.5                | 1        |
| vegetables                          | 1362.5            | 27.5              | 41                  | 1        |
| Energy Technologies                 | [\$/kW]           | [\$/kW]           | [\$/kWh]            |          |
| coal st cl                          | 6860              | 24                | 0.048611            | 0.9      |
| electricity distribution industry   | 1120              | 36                | 0.034722            | 0.9      |
| electricity distribution irrigation | 1120              | 36                | 0.034722            | 0.9      |
| electricity distribution rural      | 1120              | 36                | 0.034722            | 0.9      |
| electricity distribution urban      | 1120              | 36                | 0.034722            | 0.9      |
| electricity short strg              | 3000              | 16                | 0.020833            | 0.9      |
| gas cc ac                           | 1105              | 17                | 0.037264            | 0.9      |
| gas cc cl                           | 1064              | 16                | 0.036875            | 0.9      |
| gas cc ot                           | 1023              | 15                | 0.036111            | 0.9      |
| gas gt                              | 676               | 7                 | 0.122222            | 0.9      |
| gas st cl                           | 1205              | 17                | 0.048611            | 0.9      |
| geothermal cl                       | 6343              | 135               | 0.025               | 0.9      |
| hydro old                           | 5000              | 15                | 0                   | 0.95     |
| igcc cl                             | 4131              | 32                | 0.079167            | 0.9      |
| nuclear cl                          | 5751              | 97                | 0.029167            | 0.9      |
| oil cc cl                           | 1064              | 16                | 0.036875            | 0.9      |
| oil gt                              | 676               | 7                 | 0.122222            | 0.9      |
| solar pv 1                          | 3873              | 15                | 0.004167            | variable |
| solar pv 2                          | 3873              | 15                | 0.004167            | variable |
| solar pv 3                          | 3873              | 15                | 0.004167            | variable |
| wind 1                              | 7000              | 8                 | 0                   | variable |
| wind 2                              | 7000              | 8                 | 0                   | variable |
| wind 3                              | 7000              | 8                 | 0                   | variable |

**Table S3.** Investment, fixed and variable costs and capacity factor values for model technologies. Sources: Parkinson et al. (2016); Fricko et al. (2016); Kahil et al. (2018) and local data



| Technology                             | $I_{cost}$ [unit] | $F_{cost}$ [unit] | $Var_{cost}$ [unit] | CF [-] |
|----------------------------------------|-------------------|-------------------|---------------------|--------|
| Irrigation technologies                | [\$/ha]           | [\$/ha]           | [\$/(ha month)]     |        |
| drip                                   | 2600              | 52                | 78                  | 0.9    |
| flood                                  | 460               | 10                | 14                  | 0.9    |
| sprinkler                              | 1625              | 33                | 49                  | 0.9    |
| canal lining flood                     | 3110              | 62                | 94                  | 0.9    |
| smart                                  | 2825              | 57                | 85                  | 0.9    |
| drip smart                             | 3100              | 62                | 93                  | 0.9    |
| sprinkler smart                        | 2125              | 43                | 64                  | 0.9    |
| Water diversion/treatment technologies | [\$/(mq /day)]    | [\$/(mq /day)]    |                     |        |
| industry gw diversion                  | 20                | 8.5               | 0                   | 0.9    |
| industry sw diversion                  | 57                | 3                 | 0                   | 0.9    |
| industry wastewater recycling          | 1350              | 99                | 0                   | 0.9    |
| industry wastewater treatment          | 431               | 37                | 0                   | 0.9    |
| irrigation gw diversion                | 8.5               | 1                 | 0                   | 0.9    |
| irrigation sw diversion                | 57                | 3                 | 0                   | 0.9    |
| rural gw diversion                     | 8.5               | 1                 | 0                   | 0.9    |
| rural piped distribution               | 326               | 18                | 0                   | 0.9    |
| rural sw diversion                     | 57                | 3                 | 0                   | 0.9    |
| rural wastewater recycling             | 1350              | 99                | 0                   | 0.9    |
| rural wastewater treatment             | 759               | 77                | 0                   | 0.9    |
| smart irrigation sw diversion          | 62.7              | 3.3               | 0                   | 0.9    |
| urban gw diversion                     | 20                | 8.5               | 0                   | 0.9    |
| urban piped distribution               | 1013              | 252               | 0                   | 0.9    |
| urban sw diversion                     | 57                | 3                 | 0                   | 0.9    |
| urban wastewater collection            | 785               | 251               | 0                   | 0.9    |
| urban wastewater irrigation            | 1350              | 99                | 0                   | 0.9    |
| urban wastewater recycling             | 1350              | 99                | 0                   | 0.9    |
| urban wastewater treatment             | 431               | 37                | 0                   | 0.9    |

**Table S4.** Investment, fixed and variable costs and capacity factor values for model technologies. Sources: Parkinson et al. (2016); Fricko et al. (2016); Kahil et al. (2018) and local data.

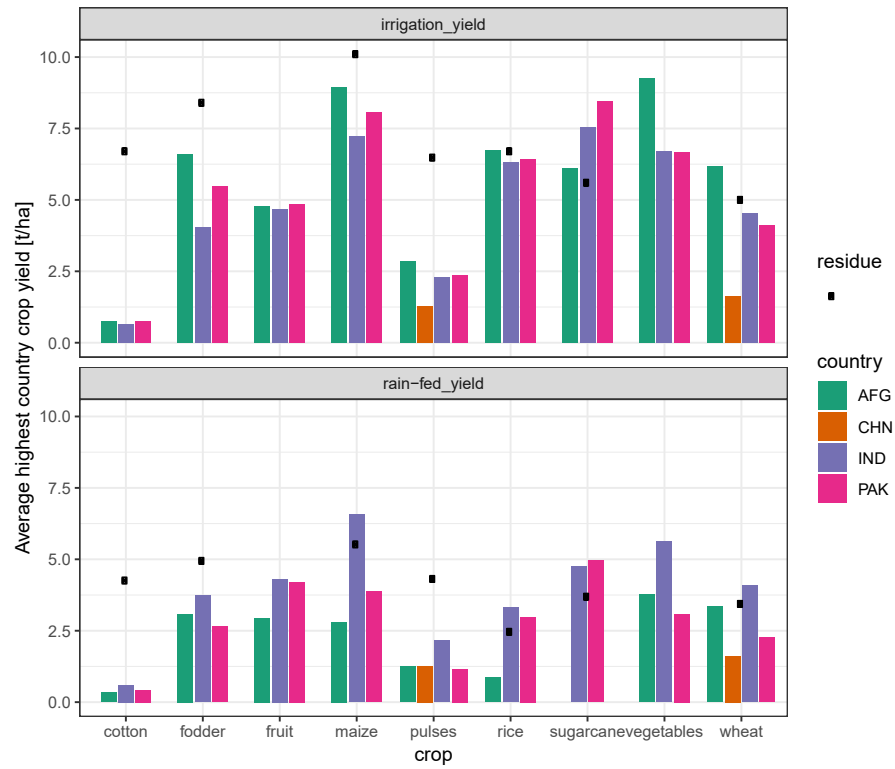

**Figure S3.** Average highest irrigated and non-irrigated yield for each crop-country pairing in the NEST implementation of the IRB as well as the corresponding rates of residue generation. Sources: GAE

## References

- GAEZ: Global Agro-Ecological Zones, <http://www.fao.org/nr/gaez/en/>.
- Fricko, O., Parkinson, S. C., Johnson, N., Strubegger, M., van Vliet, M. T., and Riahi, K.: Energy sector water use implications of a 2 C climate policy, *Environmental Research Letters*, 11, 034011, 2016.
- 5 Kahil, T., Parkinson, S., Satoh, Y., Greve, P., Burek, P., Veldkamp, T. I., Burtscher, R., Byers, E., Djilali, N., Fischer, G., et al.: A Continental-Scale Hydroeconomic Model for Integrating Water-Energy-Land Nexus Solutions, *Water resources research*, 2018.
- Parkinson, S. C., Djilali, N., Krey, V., Fricko, O., Johnson, N., Khan, Z., Sedraoui, K., and Almasoud, A. H.: Impacts of groundwater constraints on Saudi Arabia's low-carbon electricity supply strategy, *Environmental science & technology*, 50, 1653–1662, 2016.
- Raptis, C. E., van Vliet, M. T. H., and Pfister, S.: Global thermal pollution of rivers from thermoelectric power plants, *Environmental Research*
- 10 *Letters*, 11, 104011, <https://doi.org/10.1088/1748-9326/11/10/104011>, <http://stacks.iop.org/1748-9326/11/i=10/a=104011?key=crossref.7a2b2c2dfaec2038518ecba79efec9d6>, 2016.
- van Vliet, M. T., Wiberg, D., Leduc, S., and Riahi, K.: Power-generation system vulnerability and adaptation to changes in climate and water resources, *Nature Climate Change*, 6, 375, 2016.
